# Supplementary material for: Generalization and Dilution of Association Results from European GWAS in Populations of Non-European Ancestry: The PAGE Study
Source: PLoS Biol. 2013 Sep 17;11(9):e1001661. doi: 10.1371/journal.pbio.1001661 (PMC3775722; doi:10.1371/journal.pbio.1001661)
Supplement: Table S4 — Summary of Metabochip variants that passed QC with minor allele frequency greater than 1% in the PAGE AAmchip subpopulation is given, along with the generalization results comparing only the index tagSNP from the AAmchip against PAGE EA. (XLSX) [file pbio.1001661.s006.xlsx]

## Sheet: Sheet1
		Metabochip PAGE AA index tagSNP
Index tagSNP	Number of mchip SNPs with MAF>1%	N	beta	se beta	p(bAA=0)	p(same beta)
rs28927680	449	5550	0.0137	0.0123	0.2667	1.16e-18
rs9989419*	84
rs4420638*	46
rs599839	551	5490	2.1578	0.9035	0.01693	0.000505
rs780094	1779	5543	0.0391	0.0116	0.0007361	0.0461
rs16996148	740	5487	1.3022	1.1095	0.2405	0.00119
rs17145738	429	5551	-0.0495	0.0156	0.001505	0.123
rs9939609	1296	5813	0.1436	0.1111	0.1962	0.241
rs5219	349	5790	0.0261	0.1074	0.808	0.402
rs3764261*	84
rs2954029	166	5543	0.0109	0.0095	0.2498	0.014
* These three tagSNPs failed to genotype on the metabochip, so direct analysis was not possible
